# Supplementary material for: Synthesis and conformational analysis ofd-2′-deoxy-2′,2′-difluoro-4′-dihydro-4′-thionucleosides
Source: Royal Society of Chemistry journal article supplement (doi:10.1039/b914679b), 2009-11-02

## Supporting Information

### Synthesis and Conformational Analysis of D-2'-deoxy-2',2'-difluoro-4'-dihydro-4'-thionucleosides

Feng Zheng<sup>†</sup>, Lin Fu<sup>‡</sup>, Xingang Zhang<sup>†</sup>, Wang Renxiao<sup>‡</sup> and Feng-ling Qing<sup>\*,†</sup>

<sup>†</sup>Key Laboratory of Organofluorine Chemistry, Shanghai Institute of Organic Chemistry, Chinese Academy of Science, 354 Fengling Lu, Shanghai 200032, China

<sup>‡</sup> State Key Laboratory of Bioorganic and Natural Products Chemistry, Shanghai Institute of Organic Chemistry, Chinese Academy of Sciences, 354 Fenglin Lu, Shanghai 200032, China

\*Correspondence: [flq@mail.sioc.ac.cn](mailto:flq@mail.sioc.ac.cn)

|                                                                                             |     |
|---------------------------------------------------------------------------------------------|-----|
| Computational methods for MD simulation.....                                                | S3  |
| <b>Figure 1.</b> RMSD curve of MD simulation using Conformation N as initial structure..... | S4  |
| <b>Figure 2.</b> RMSD curve of MD simulation using Conformation S as initial structure..... | S5  |
| Preparation and characterization data for compound <b>5b</b> and <b>5b'</b> .....           | S6  |
| Preparation and characterization data for compound <b>5c</b> and <b>5c'</b> .....           | S6  |
| <sup>1</sup> H NMR spectrum of compound <b>7</b> .....                                      | S8  |
| <sup>13</sup> C NMR spectrum of compound <b>7</b> .....                                     | S8  |
| COSY spectrum of compound <b>7</b> .....                                                    | S9  |
| HSQC spectrum of compound <b>7</b> .....                                                    | S9  |
| <sup>1</sup> H NMR spectrum of compound <b>8</b> .....                                      | S10 |
| <sup>13</sup> C NMR spectrum of compound <b>8</b> .....                                     | S10 |
| COSY spectrum of compound <b>8</b> .....                                                    | S11 |
| HSQC spectrum of compound <b>8</b> .....                                                    | S11 |
| Chiral HPLC analytical data of compound <b>8</b> .....                                      | S12 |
| <sup>1</sup> H NMR spectrum of compound <b>9</b> .....                                      | S13 |
| <sup>13</sup> C NMR spectrum of compound <b>9</b> .....                                     | S13 |
| COSY spectrum of compound <b>9</b> .....                                                    | S14 |
| HSQC spectrum of compound <b>9</b> .....                                                    | S14 |
| <sup>1</sup> H NMR spectrum of compound <b>5a</b> .....                                     | S15 |
| <sup>13</sup> C NMR spectrum of compound <b>5a</b> .....                                    | S15 |
| COSY spectrum of compound <b>5a</b> .....                                                   | S16 |
| HSQC spectrum of compound <b>5a</b> .....                                                   | S16 |
| NOESY NMR spectrum of compound <b>5a</b> .....                                              | S17 |
| X-ray crystal structure of of compound <b>5a</b> .....                                      | S17 |
| <sup>1</sup> H NMR spectrum of compound <b>5b</b> .....                                     | S18 |
| <sup>13</sup> C NMR spectrum of compound <b>5b</b> .....                                    | S18 |
| <sup>1</sup> H NMR spectrum of compound <b>5c</b> .....                                     | S19 |
| <sup>13</sup> C NMR spectrum of compound <b>5c</b> .....                                    | S19 |
| <sup>1</sup> H NMR spectrum of compound <b>5a'</b> .....                                    | S20 |
| <sup>13</sup> C NMR spectrum of compound <b>5a'</b> .....                                   | S20 |

|                                                           |     |
|-----------------------------------------------------------|-----|
| <sup>1</sup> H NMR spectrum of compound <b>5b'</b> .....  | S21 |
| <sup>13</sup> C NMR spectrum of compound <b>5b'</b> ..... | S21 |
| <sup>1</sup> H NMR spectrum of compound <b>5c'</b> .....  | S22 |
| <sup>13</sup> C NMR spectrum of compound <b>5c'</b> ..... | S22 |

**Molecular dynamics simulation.** Two molecular dynamics (MD) simulations were performed to study the *S*-conformer and the *N*-conformer in methanol, respectively. The electrostatic potentials of these two conformers were computed using the Gaussian 03 program at the B3LYP/6-311++G(2d,2p) level. Atomic partial charges were derived by the Restricted Electrostatic potential (RESP) method. The GAFF force field was applied to all computational jobs described below. To set up each MD job, the given conformer was soaked in a pre-optimized methanol box with a size of 20 Å × 20 Å × 20 Å with the periodic boundary condition. The entire system was then minimized at a stepwise manner. (1) 5000 steps of minimization with restraints on backbone (the harmonic force constant = 500.0 kcal/(mol·Å<sup>2</sup>)) (2) 5000 steps of minimization with restraints on backbone (the harmonic force constant = 10.0 kcal/(mol·Å<sup>2</sup>)). (3) 5000 steps of minimization without any restraints. At each round of minimization mentioned above, the steepest descent method was used for the first 500 cycles, and then the conjugated gradient method was used for the rest. To relax the entire system further, three rounds of position-restrained molecular dynamics simulations were conducted: (1) 30000 steps of MD simulation with restraints on backbone (the harmonic force constant = 5.0 kcal/(mol·Å<sup>2</sup>)). (2) 40000 steps of MD simulation with restraints on backbone (the harmonic force constant = 0.5 kcal/(mol·Å<sup>2</sup>)). (3) 50000 steps of MD simulation without restraint. After all of these preparations, a production run of 10 ns long was performed to sample the possible conformations of the given molecule in solution.

During the entire MD simulation, the time interval was set to 2 fs. Temperature ( $T = 300\text{ K}$ ) was regulated by the Langevin thermostat with the collision frequency  $\gamma = 2.0\text{ ps}^{-1}$ . Pressure ( $P = 1\text{ atm}$ ) was controlled by the Berendsen barostat. A distance cutoff of 14 Å for non-bonded interactions was used. The Particle Mesh Ewald (PME) method was used with a grid spacing of 1 Å combined with a fourth-order-B-spline interpolation to compute potentials and forces between grid points. The SHAKE algorithm was used to constrain all bonds involving hydrogen atoms. The conformational changes of the given molecule, quantified by the root-mean-square deviation (RMSD) values computed using the starting structure as reference, were monitored along the entire MD trajectory. Only the conformations sampled during the last 4 ns of MD simulation were considered in free energy calculation since the whole system was at good equilibrium at that stage.

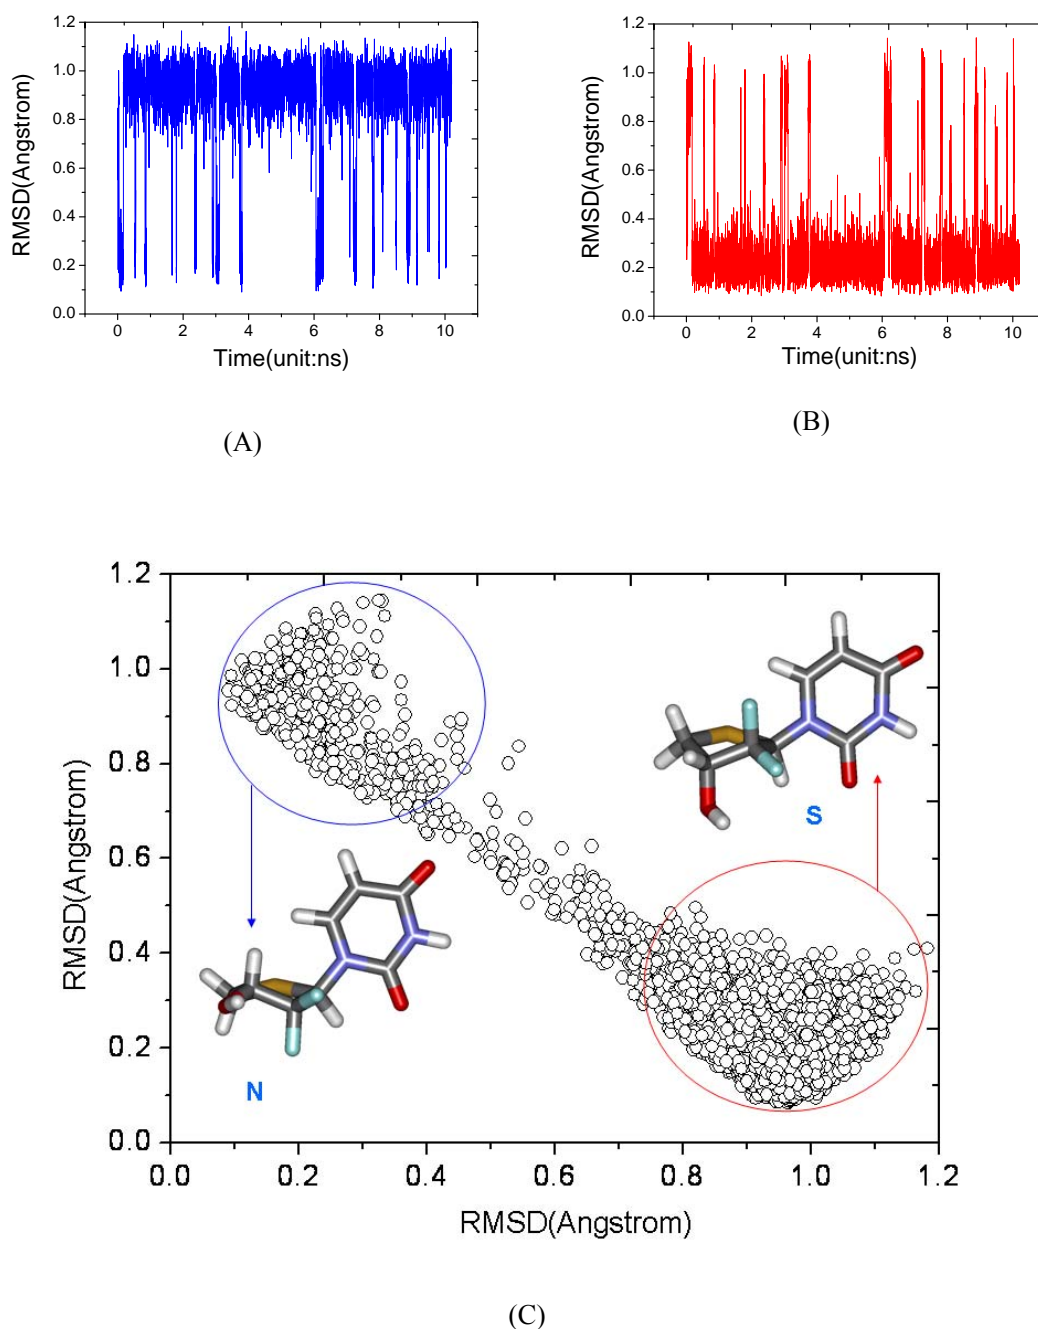

**Figure 1.** Conformational changes observed during the MD simulation in methanol using the *N*-conformer as the starting structure. (A) RMSD values on the MD trajectory computed using the *N*-conformer as reference. (B) RMSD values on the MD trajectory computed using the *S*-conformer as reference. (C) The *X* axis is the RMSD values computed using the *N*-conformer as reference; while the *Y* axis is the RMSD values computed using the *S*-conformer as reference. Apparently, conformations close to the *S*-conformer are much more populated during MD simulation.

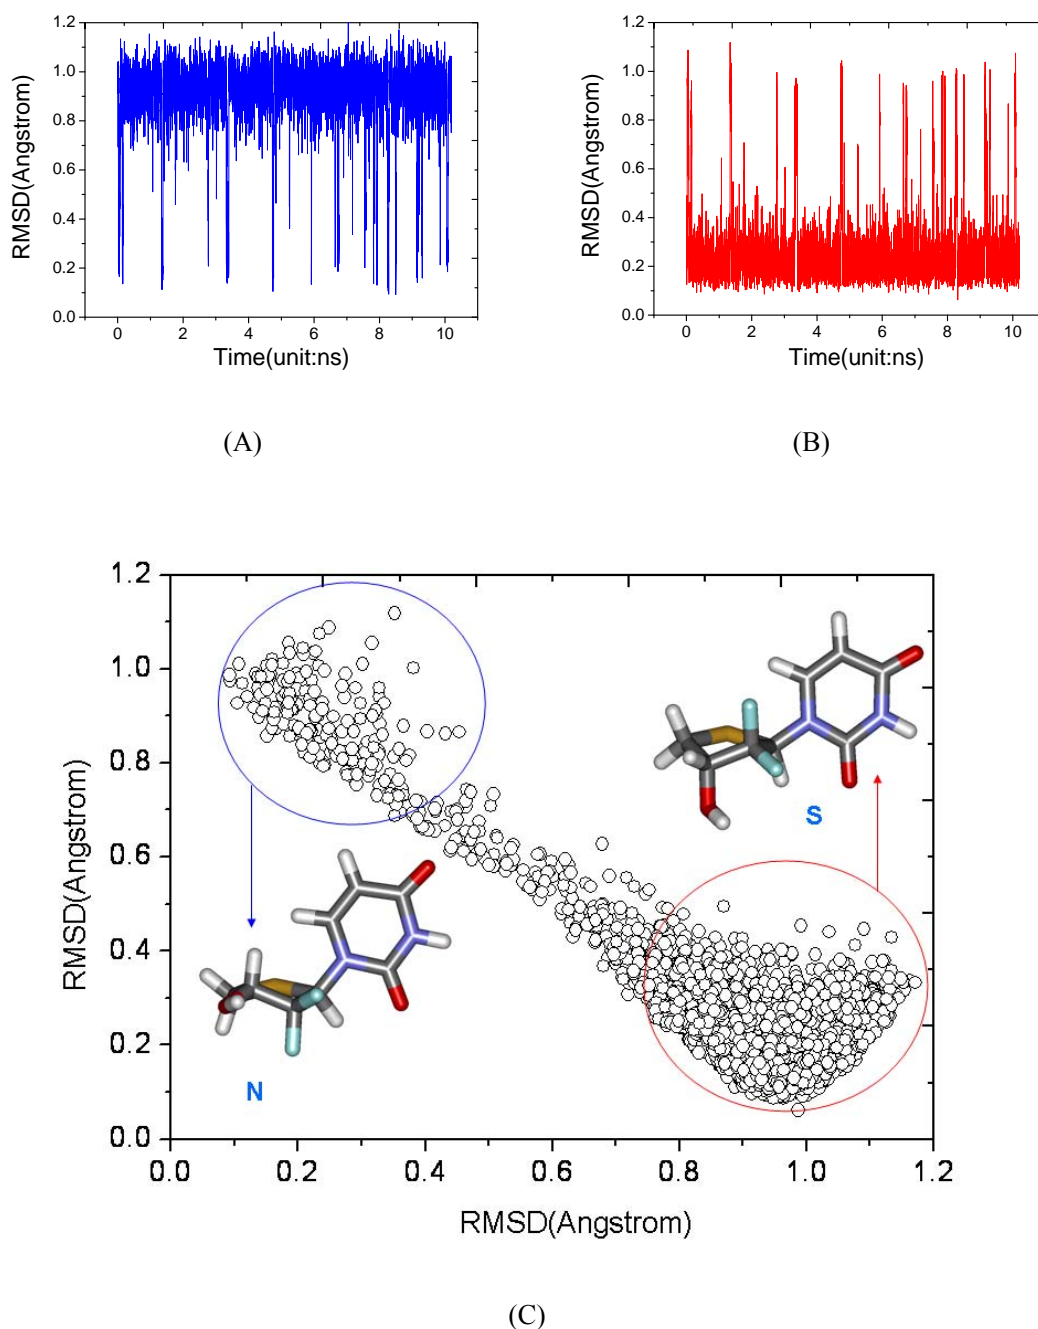

**Figure 2.** Conformational changes observed during the MD simulation in methanol using the *S*-conformer as the starting structure. (A) RMSD values on the MD trajectory computed using the *N*-conformer as reference. (B) RMSD values on the MD trajectory computed using the *S*-conformer as reference. (C) The *X* axis is the RMSD values computed using the *N*-conformer as reference; while the *Y* axis is the RMSD values computed using the *S*-conformer as reference. Apparently, conformations close to the *S*-conformer are much more populated during MD simulation.

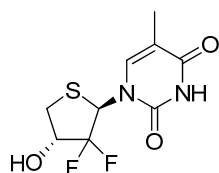

**1-((2R,4S)-3,3-difluoro-4-hydroxytetrahydrothiophen-2-yl)thymine (5b)**

Conversion of compound **9** (119 mg, 0.52 mmol) to **5b** and **5b'** was accomplished using the same procedure as described for compound **5a**. Compound **5b** (34 mg, 26% yield for three steps) was obtained as a white solid:  $[\alpha]_D^{26} = -44.4$  ° (*c* 0.90 MeOH);  $^1\text{H NMR}$  (300 MHz, MeOH- $d_4$ )  $\delta$  7.79 (dd, *J* = 2.7, 1.5 Hz, 1H), 6.50 (dd, *J* = 12.3, 9.6 Hz, 1H), 4.40 (m, 1H), 3.46 (m, 1H), 2.85 (m, 1H), 1.91 (d, *J* = 0.9 Hz, 3H);  $^{13}\text{C NMR}$  (75.5 MHz, MeOH- $d_4$ )  $\delta$  165.9, 152.8, 139.1 (d, *J* = 4.4 Hz), 126.4 (dd, *J* = 262.8, 255.8 Hz), 111.9, 72.9 (dd, *J* = 30.6, 22.1 Hz), 59.5 (dd, *J* = 30.8, 18.9 Hz), 32.7, 12.4;  $^{19}\text{F NMR}$  (282 MHz, MeOH- $d_4$ )  $\delta$  -119.5 (dd, *J* = 236.6, 14.5 Hz, 1F), -123.2 (dt, *J* = 235.3, 7.9 Hz, 1F); IR (KBr)  $\nu_{\text{max}}$  3211, 3057, 1697, 1466, 1377, 1079  $\text{cm}^{-1}$ ; MS (ESI) *m/z* 265.0 ( $\text{M}^+ + \text{H}$ ), HRMS Calcd for  $\text{C}_9\text{H}_{11}\text{O}_3\text{N}_2\text{F}_2\text{S}$  ( $\text{M}^+ + \text{H}$ ): 265.0449. Found: 265.0453.

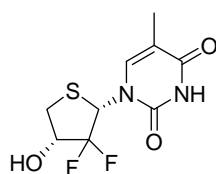

**1-((2S,4S)-3,3-difluoro-4-hydroxytetrahydrothiophen-2-yl)thymine (5b')**

Compound **5b'** (19 mg, 26% yield for three steps) was obtained as a white solid :  $[\alpha]_D^{26} = 17.8$  ° (*c* 0.85 MeOH);  $^1\text{H NMR}$  (300 MHz, MeOH- $d_4$ )  $\delta$  8.03 (s, 1H), 6.37 (dd, *J* = 13.8, 4.8 Hz, 1H), 4.43 (m, 1H), 3.18 (m, 1H), 3.10 (m, 1H), 1.90 (s, 3H);  $^{13}\text{C NMR}$  (75.5 MHz, MeOH- $d_4$ )  $\delta$  166.0, 153.1, 140.3, 126.6 (dd, *J* = 265.2, 254.7 Hz), 110.9, 73.1 (dd, *J* = 31.0, 22.1 Hz), 62.1 (dd, *J* = 38.9, 20.6 Hz), 33.5, 12.5;  $^{19}\text{F NMR}$  (282 MHz, MeOH- $d_4$ )  $\delta$  -108.3 (dd, *J* = 247.6, 7.6 Hz, 1F), -124.0 (d, *J* = 244.5 Hz, 1F); IR (KBr)  $\nu_{\text{max}}$  3213, 3074, 1693, 1466, 1389, 1083  $\text{cm}^{-1}$ ; MS (ESI) *m/z* 265.0 ( $\text{M}^+ + \text{H}$ ), HRMS Calcd for  $\text{C}_9\text{H}_{11}\text{O}_3\text{N}_2\text{F}_2\text{S}$  ( $\text{M}^+ + \text{H}$ ): 265.0446. Found: 265.0446.

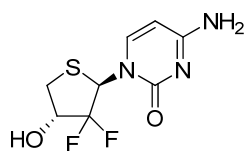

**1-((2R,4S)-3,3-difluoro-4-hydroxytetrahydrothiophen-2-yl)cytosine (5c)**

Conversion of compound **9** (131 mg, 0.57 mmol) to **5c** and **5c'** was accomplished using the similar procedure as described for compound **5a**. After removal of the benzyl group, the benzoyl group was removed using  $\text{NH}_3/\text{CH}_3\text{OH}$ . Compound **5c** (29 mg, 21% yield for four steps) was

obtained as a white solid:  $[\alpha]_D^{26} = -32.7$  ( $c$  0.90 MeOH);  $^1\text{H}$  NMR (300 MHz, MeOH- $d_4$ )  $\delta$  8.00 (dd,  $J = 7.5, 2.4$  Hz, 1H), 6.67 (dd,  $J = 12.3, 9.6$  Hz, 1H), 5.97 (d,  $J = 7.5$  Hz, 1H), 4.38 (m, 1H), 3.43 (m, 1H), 2.85 (m, 1H);  $^{13}\text{C}$  NMR (75.5 MHz, MeOH- $d_4$ )  $\delta$  167.1, 158.5, 144.5, 126.4 (dd,  $J = 262.7, 256.3$  Hz), 96.7, 73.1 (dd,  $J = 30.5, 22.1$  Hz), 60.1 (dd,  $J = 31.9, 19.5$  Hz), 32.5;  $^{19}\text{F}$  NMR (282 MHz, MeOH- $d_4$ )  $\delta$  -119.0 (dd,  $J = 235.5, 11.8$  Hz, 1F), -122.4 (dt,  $J = 234.6, 6.8$  Hz, 1F); IR (KBr)  $\nu_{\text{max}}$  3328, 3197, 1649, 1492, 1393, 1077  $\text{cm}^{-1}$ ; MS (ESI)  $m/z$  250.0 ( $\text{M}^+ + \text{H}$ ), HRMS Calcd for  $\text{C}_8\text{H}_{10}\text{O}_2\text{N}_3\text{F}_2\text{S}$  ( $\text{M}^+ + \text{H}$ ): 250.0451. Found: 250.0456.

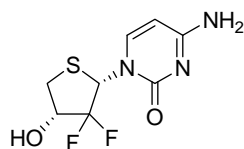

**1-((2S,4S)-3,3-difluoro-4-hydroxytetrahydrothiophen-2-yl)cytosine (5c')**

Compound **5c'** (14 mg, 11% yield for three steps) was obtained as a white solid:  $[\alpha]_D^{26} = 5.6$  ( $c$  0.60 MeOH);  $^1\text{H}$  NMR (300 MHz, MeOH- $d_4$ )  $\delta$  8.19 (d,  $J = 8.1$  Hz, 1H), 6.53 (dd,  $J = 13.8, 5.1$  Hz, 1H), 5.92 (d,  $J = 8.1$  Hz, 1H), 4.42 (m, 1H), 3.17 (m, 1H), 3.09 (m, 1H);  $^{13}\text{C}$  NMR (75.5 MHz, MeOH- $d_4$ )  $\delta$  167.5, 158.7, 145.5, 126.6 (t,  $J = 258.1$  Hz), 96.0, 73.4 (dd,  $J = 30.0, 17.1$  Hz), 60.6 (dd,  $J = 38.9, 20.1$  Hz), 33.4;  $^{19}\text{F}$  NMR (282 MHz, MeOH- $d_4$ )  $\delta$  -108.5 (dd,  $J = 237.2, 9.0$  Hz, 1F), -124.3 (d,  $J = 238.0$  Hz, 1F); IR (KBr)  $\nu_{\text{max}}$  3320, 3190, 1650, 1493, 1398, 1053  $\text{cm}^{-1}$ ; MS (ESI)  $m/z$  250.0 ( $\text{M}^+ + \text{H}$ ), HRMS Calcd for  $\text{C}_8\text{H}_{10}\text{O}_2\text{N}_3\text{F}_2\text{S}$  ( $\text{M}^+ + \text{H}$ ): 250.0447. Found: 250.0456.

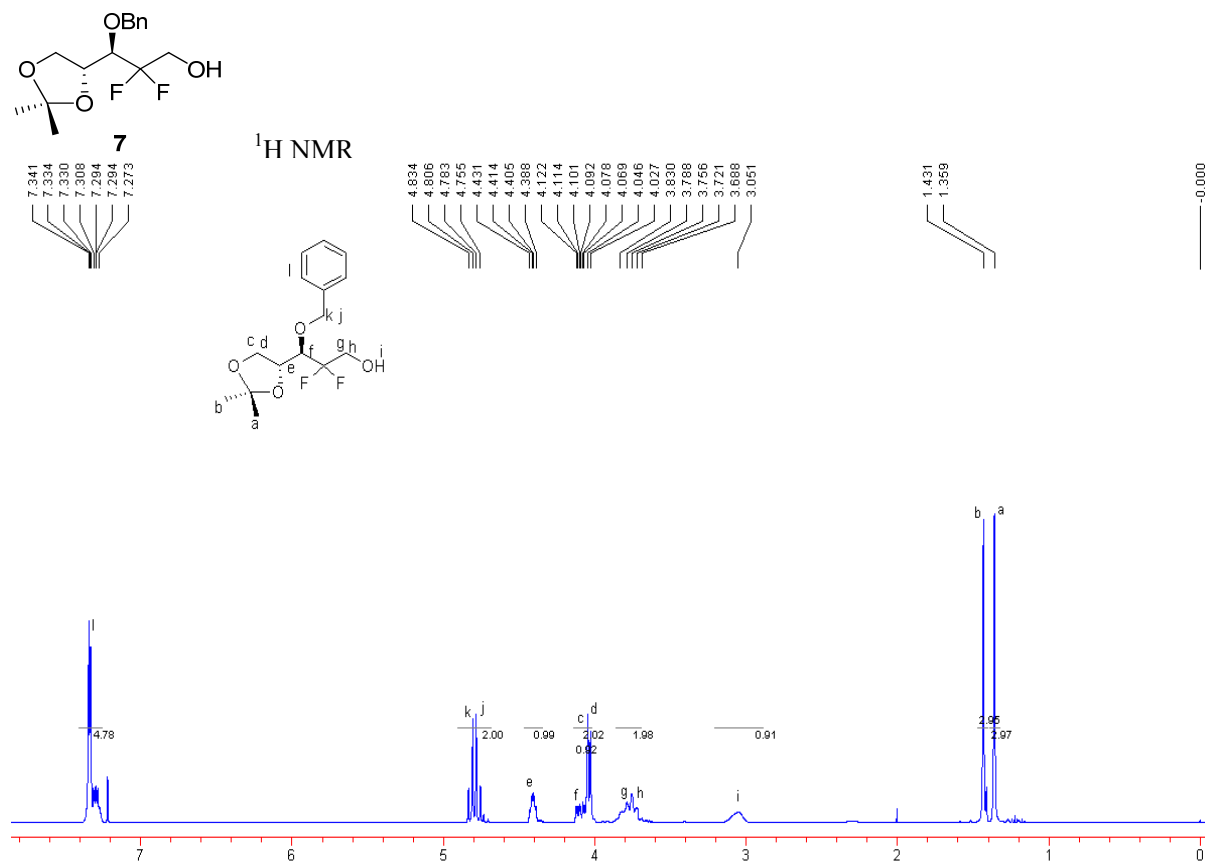

**$^{13}\text{C NMR}$**

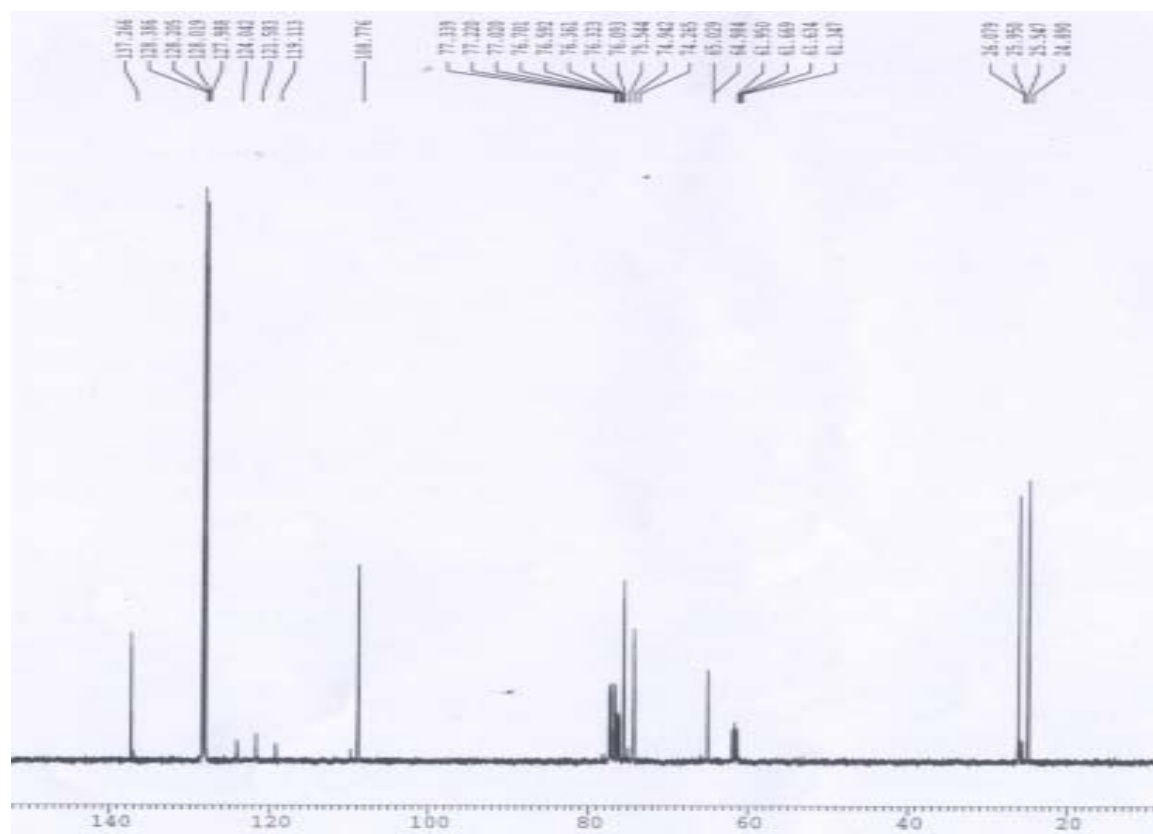



### COSY

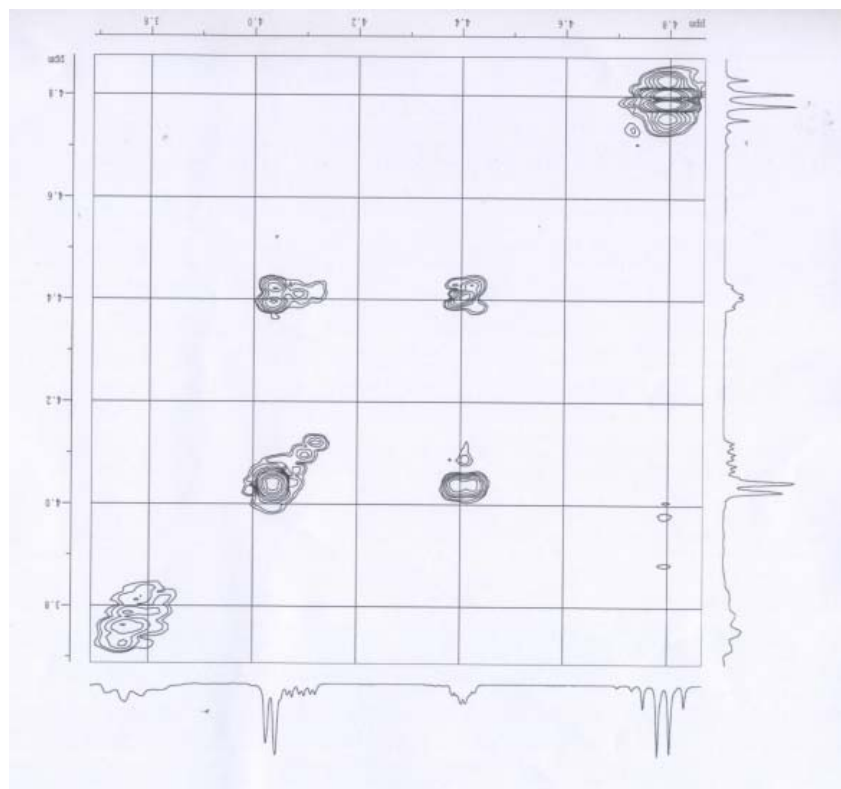

### HSQC

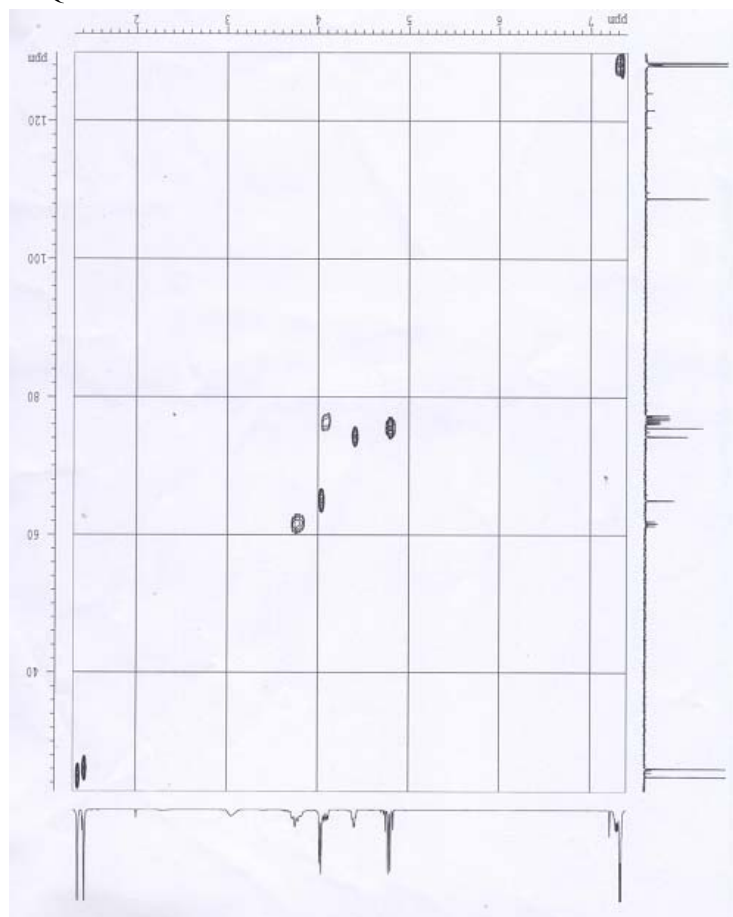

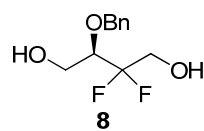

$^1\text{H NMR}$

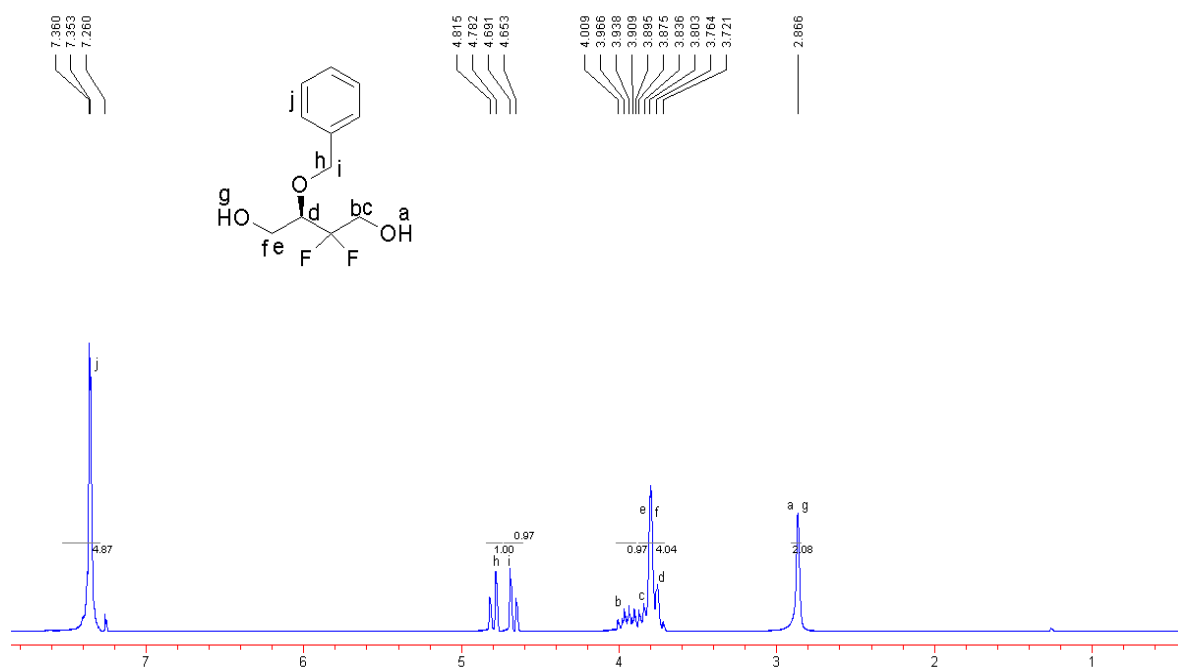

$^{13}\text{C NMR}$

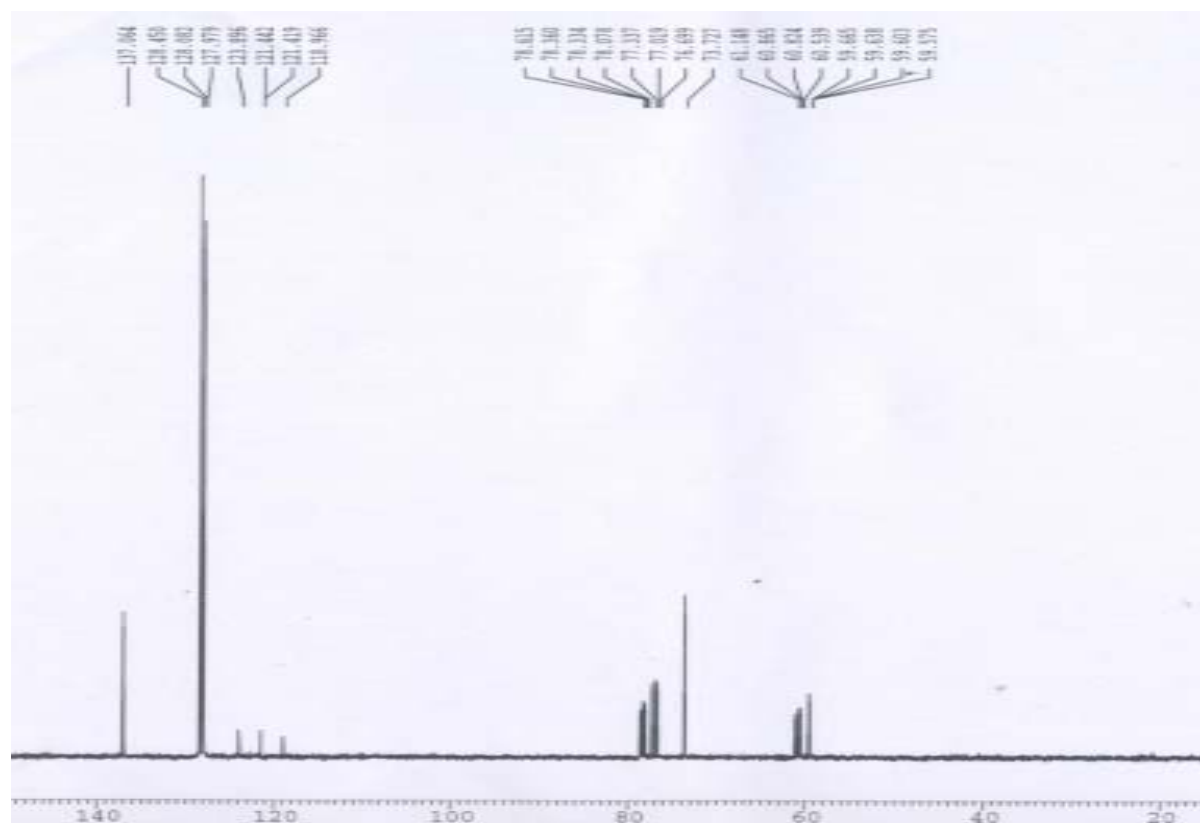

COSY

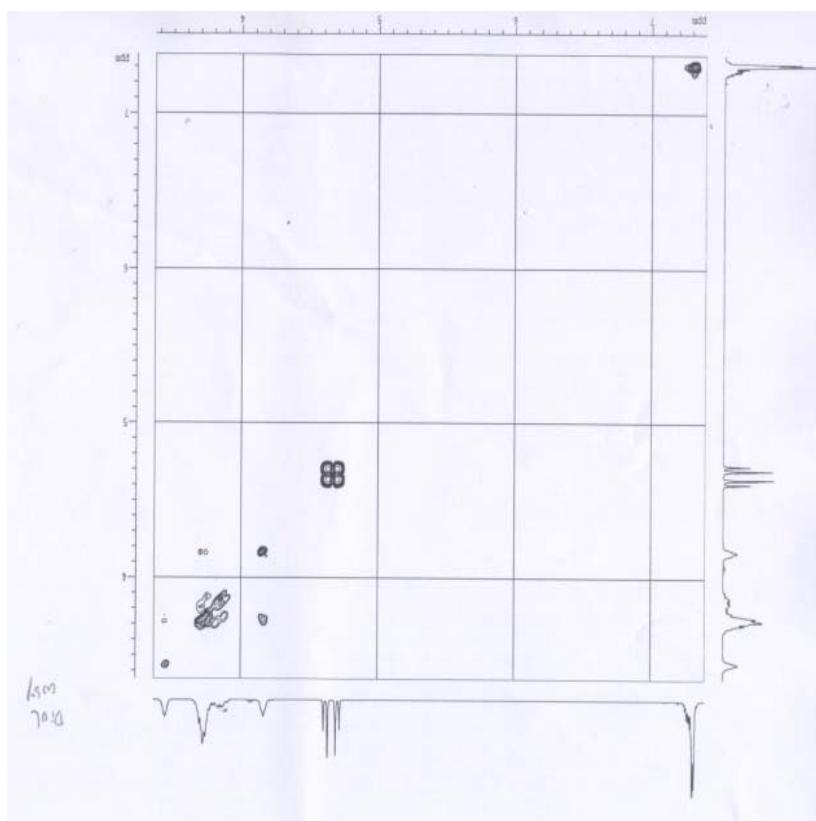

HSQC

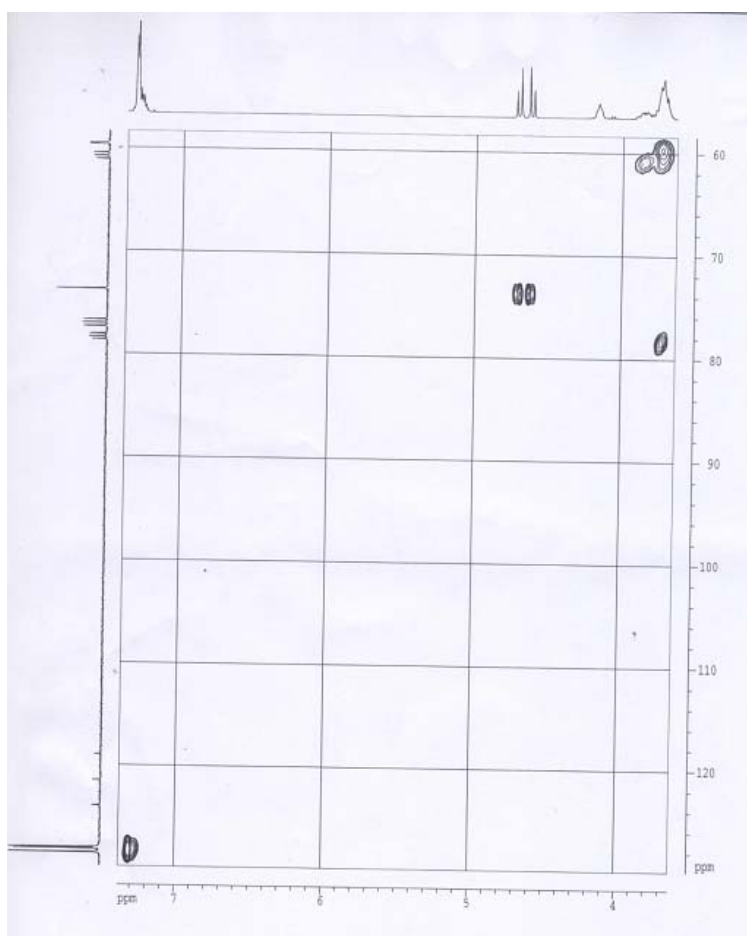

Chiral HPLC analytical data of compound **8**

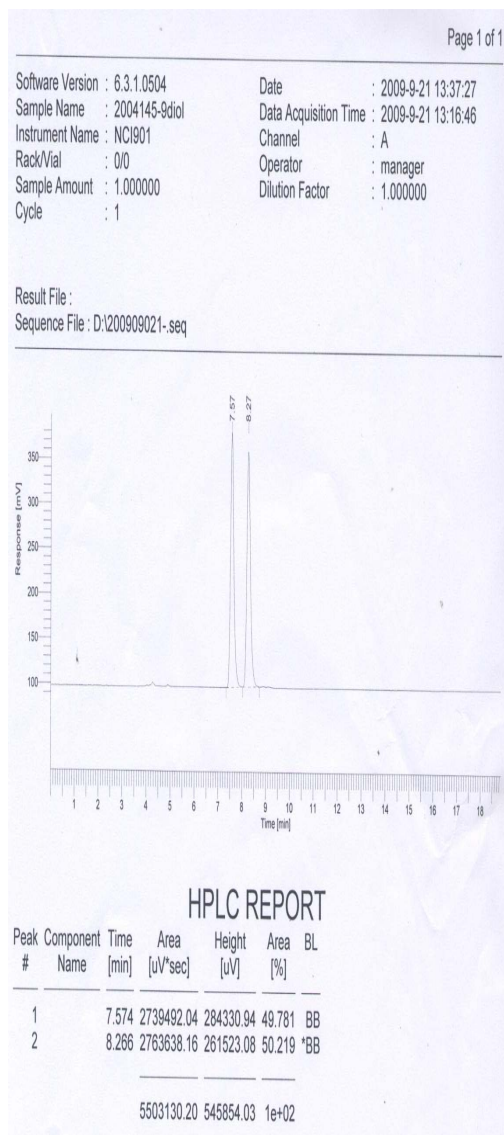

*racemic*

Software Version: 4.1<2F12>  
 Date: 07-1-23 15:59  
 Sample Name : 2004145-3-401  
 Data File : D:\CS\DING891A.RAW Date: 07-1-23 15:47  
 Sequence File: D:\CS\DING.SEQ Cycle: 1 Channel : A  
 Instrument : 970A - 0 Rack/Vial: 0/0 Operator:  
 Sample Amount : 1.0000 Dilution Factor : 1.00

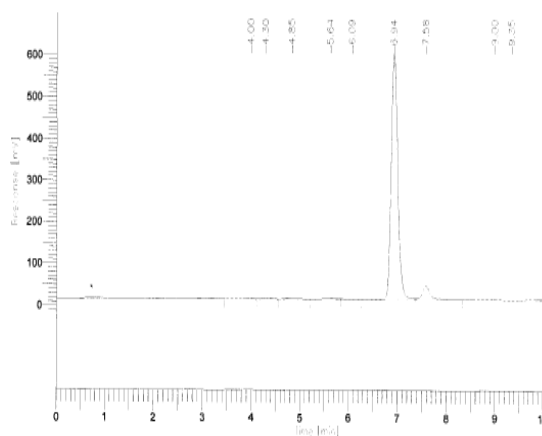

DEFAULT REPORT

| Peak # | Time [min] | Area [uv*sec] | Height [uv] | Area [%] | BL |
|--------|------------|---------------|-------------|----------|----|
| 1      | 4.003      | 27722.15      | 1813.21     | 0.46     | BV |
| 2      | 4.304      | 50734.85      | 3301.41     | 0.84     | VB |
| 3      | 4.845      | 60692.16      | 2193.70     | 1.01     | BV |
| 4      | 5.639      | 62826.48      | 2432.44     | 1.04     | VV |
| 5      | 6.086      | 29510.92      | 1290.24     | 0.49     | VV |
| 6      | 6.938      | 5437349.80    | 589257.81   | 90.36    | VV |
| 7      | 7.584      | 342205.64     | 31704.09    | 5.69     | VB |
| 8      | 9.001      | 3562.84       | 277.21      | 0.06     | BV |
| 9      | 9.350      | 1851.16       | 131.42      | 0.03     | VB |
| 10     | 10.216     | 1229.00       | 99.42       | 0.02     | BB |

6017685.00 632500.94 100.00

*88% ee*

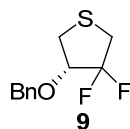

<sup>1</sup>H NMR

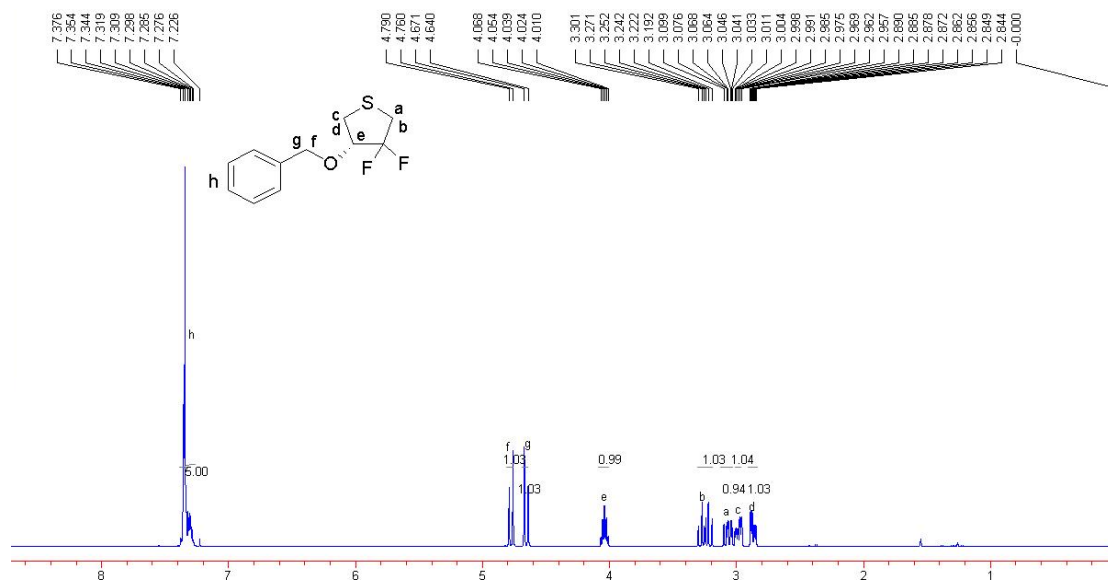

<sup>13</sup>C NMR

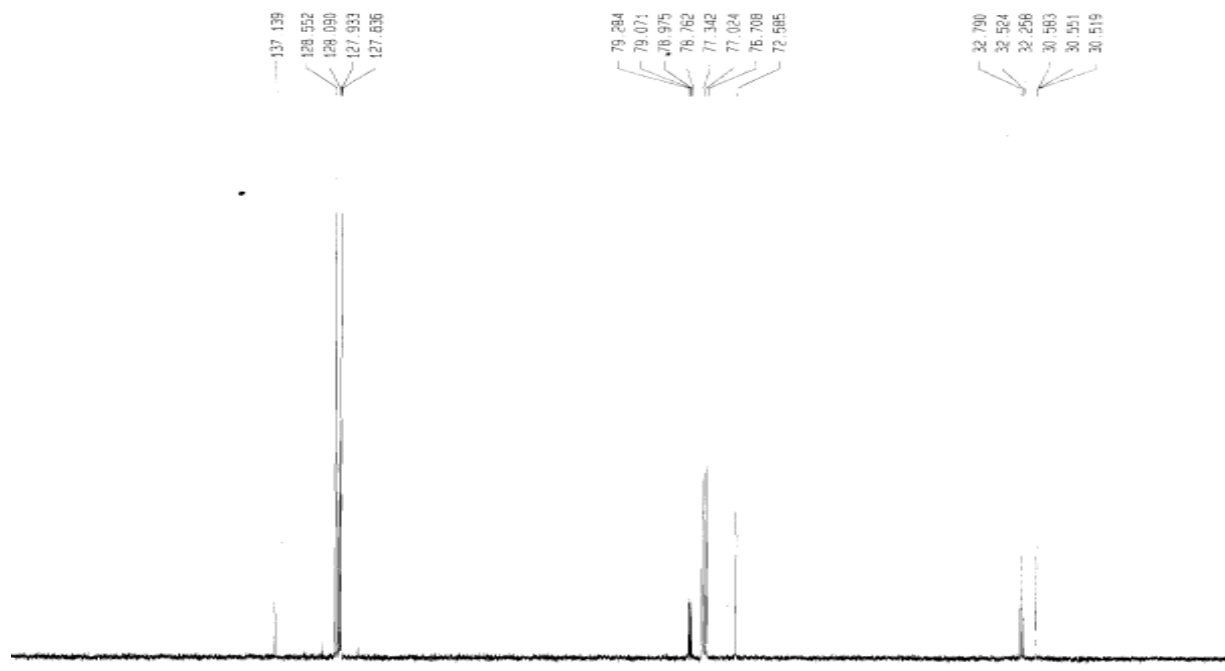

COSY

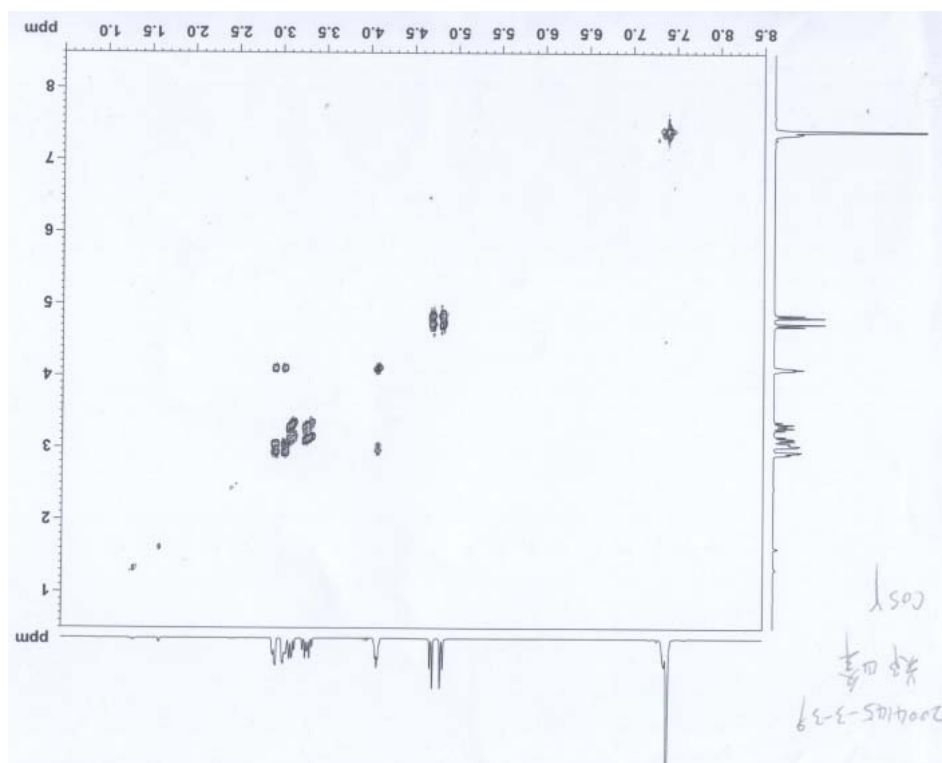

HSQC

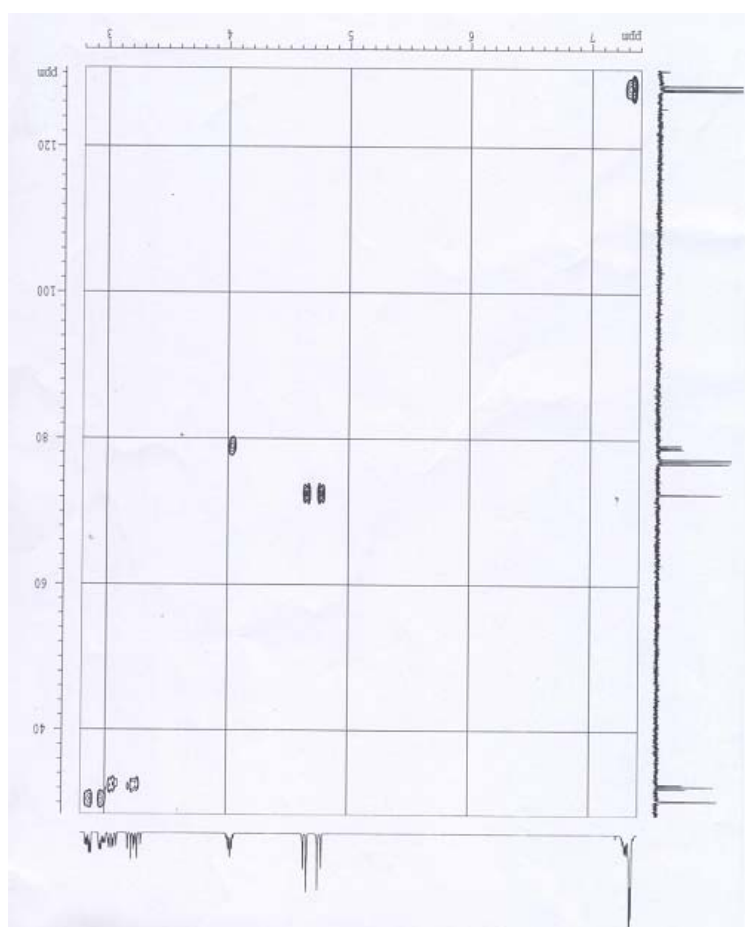

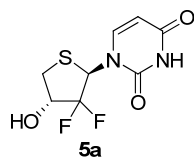

<sup>1</sup>H NMR

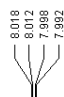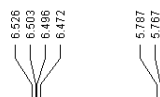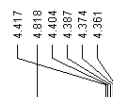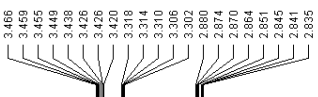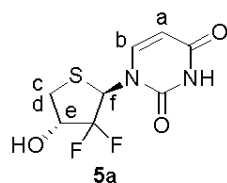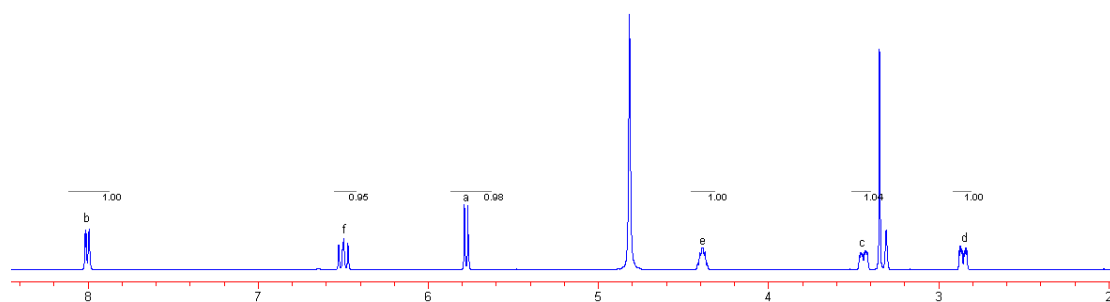

<sup>13</sup>C NMR

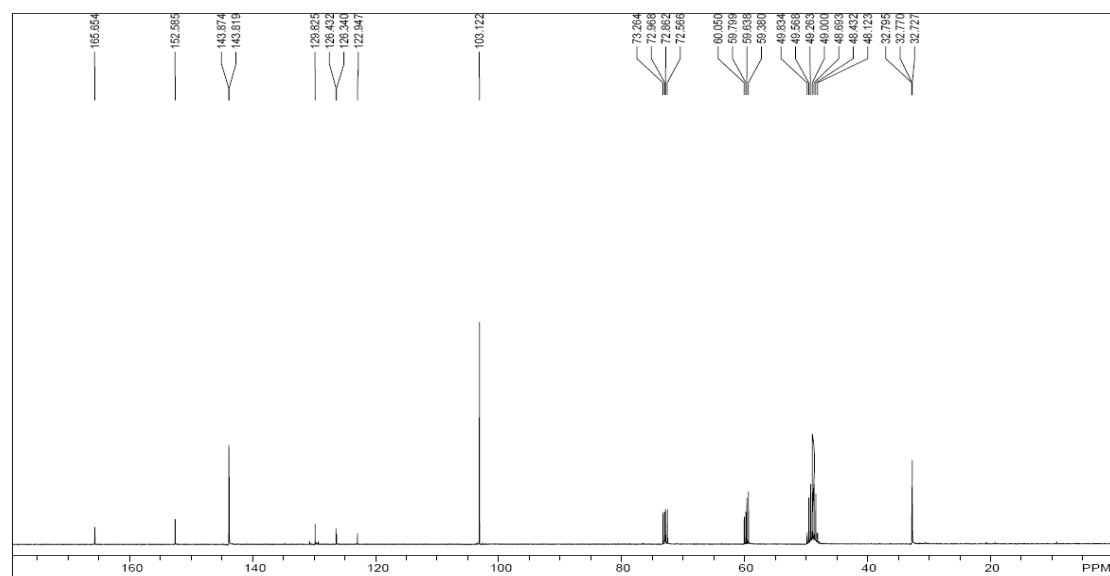

|            |              |             |             |                                              |                           |
|------------|--------------|-------------|-------------|----------------------------------------------|---------------------------|
| F1: 75.476 | F2: 1.000    | SW1: 22676  | OF1: 8103.0 | USER: stoc -- DATE: Fri May 30 15:09:31 2008 |                           |
| EX: zgdc   | PW: 5.5 usec | PD: 2.0 sec | NA: 12668   | LB: 0.0                                      | PTSId: 16384              |
|            |              |             |             |                                              | Nuts - S2004145-7-54Bc_11 |

COSY

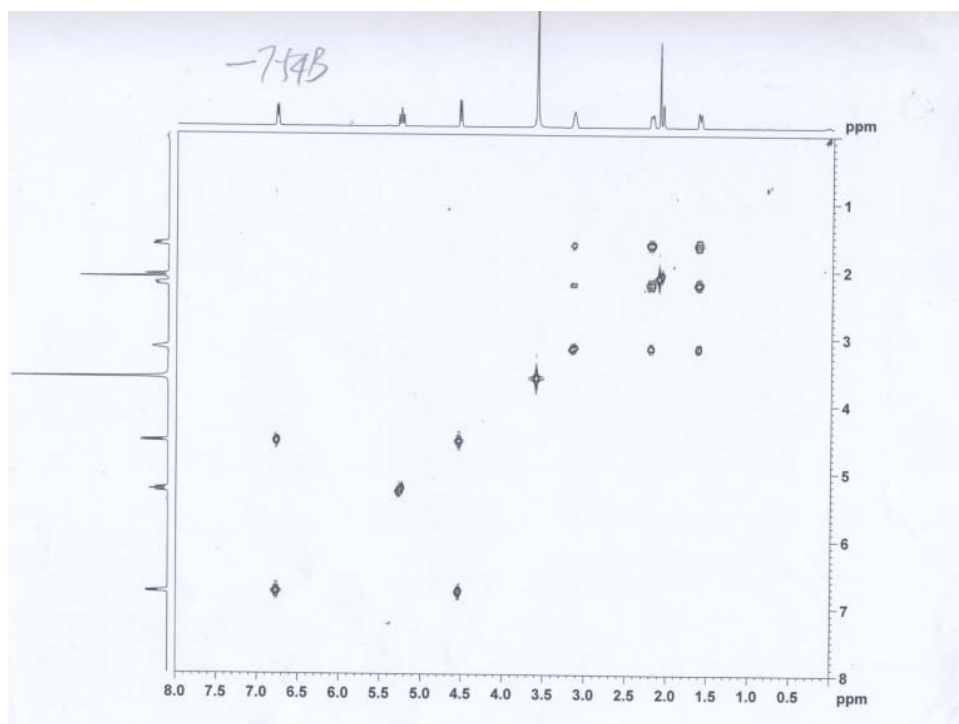

HSQC

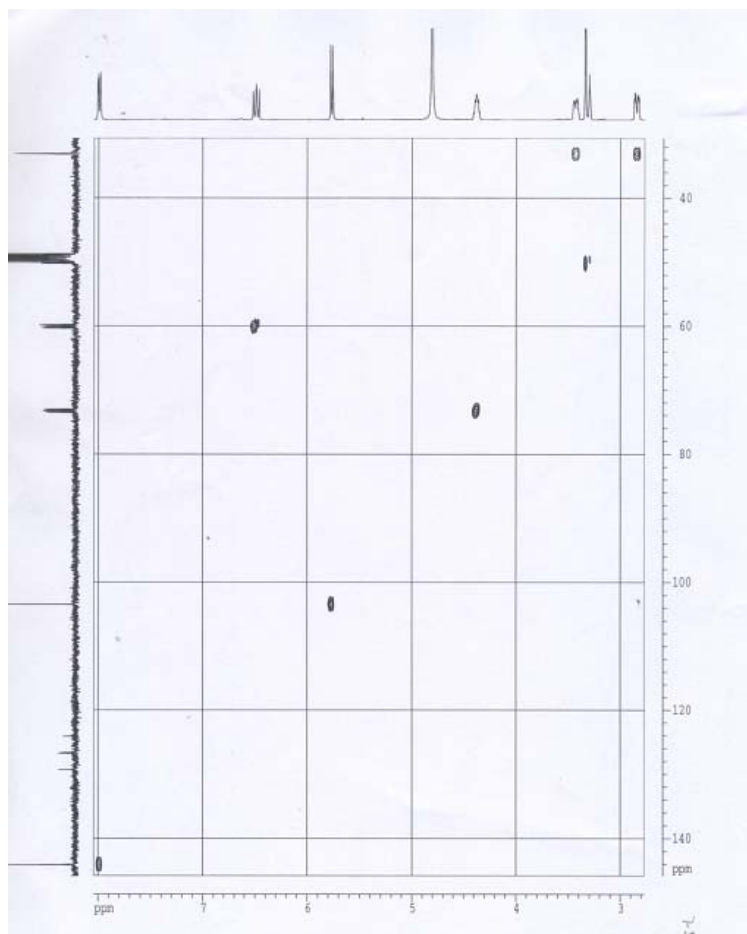



### X-ray crystal structure of compound **5a**

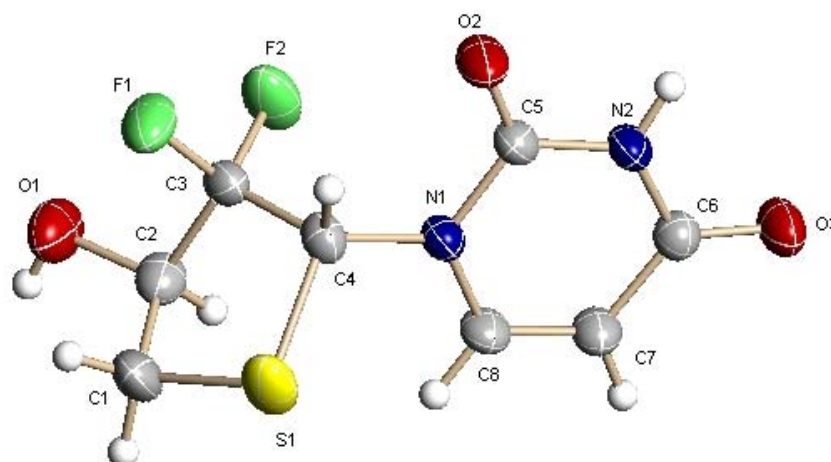

*Crystal data:* for **5a**, C<sub>8</sub>H<sub>8</sub>F<sub>2</sub>N<sub>2</sub>O<sub>3</sub>S, *M* = 250.22, Monoclinic, *a* = 6.1849(8), *b* = 18.082(2), *c* = 8.9343(11) Å,  $\alpha=90$ ,  $\beta=100.122(2)$ ,  $\gamma=90$  deg., *V* = 983.6(2) Å<sup>3</sup>, *T* = 293K, space group *P2*(1), *Z*=4, 5594 reflections collected, 2129 unique (*R*<sub>int</sub> = 0.0244), *R*<sub>1</sub> = 0.0433[*I*>2 $\delta$ (*I*)], *wR*<sub>2</sub> = 0.1110.

### NOESY NMR spectrum of compound **5a**

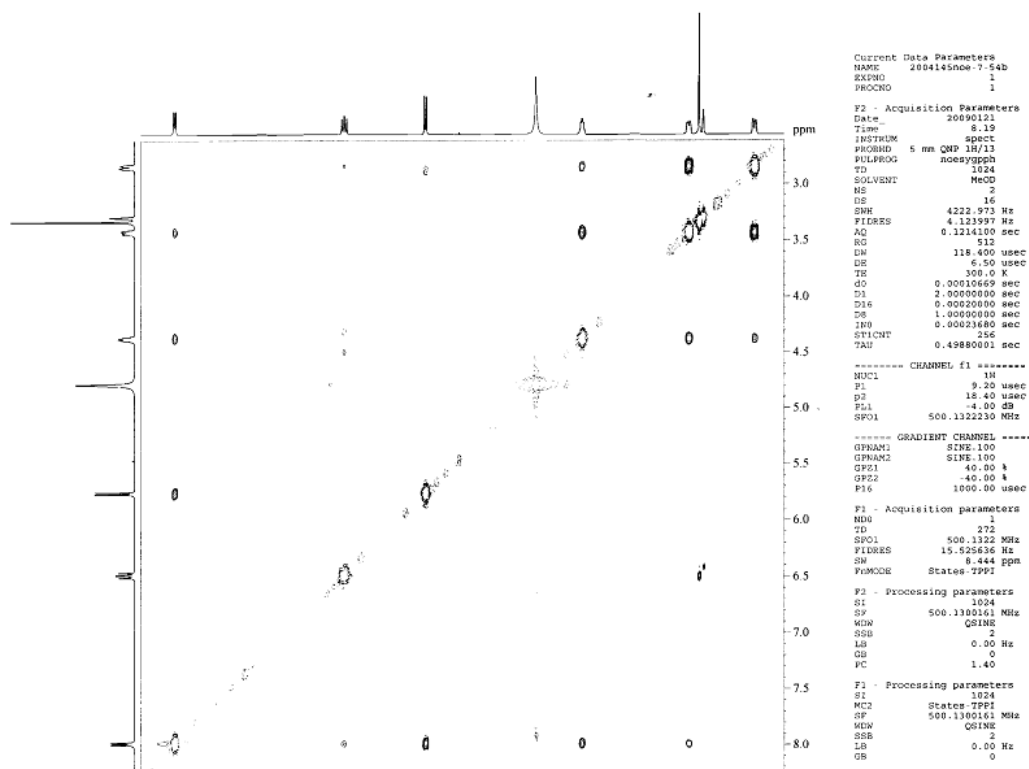

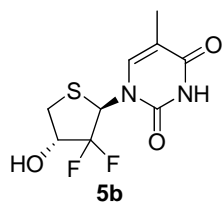

<sup>1</sup>H NMR

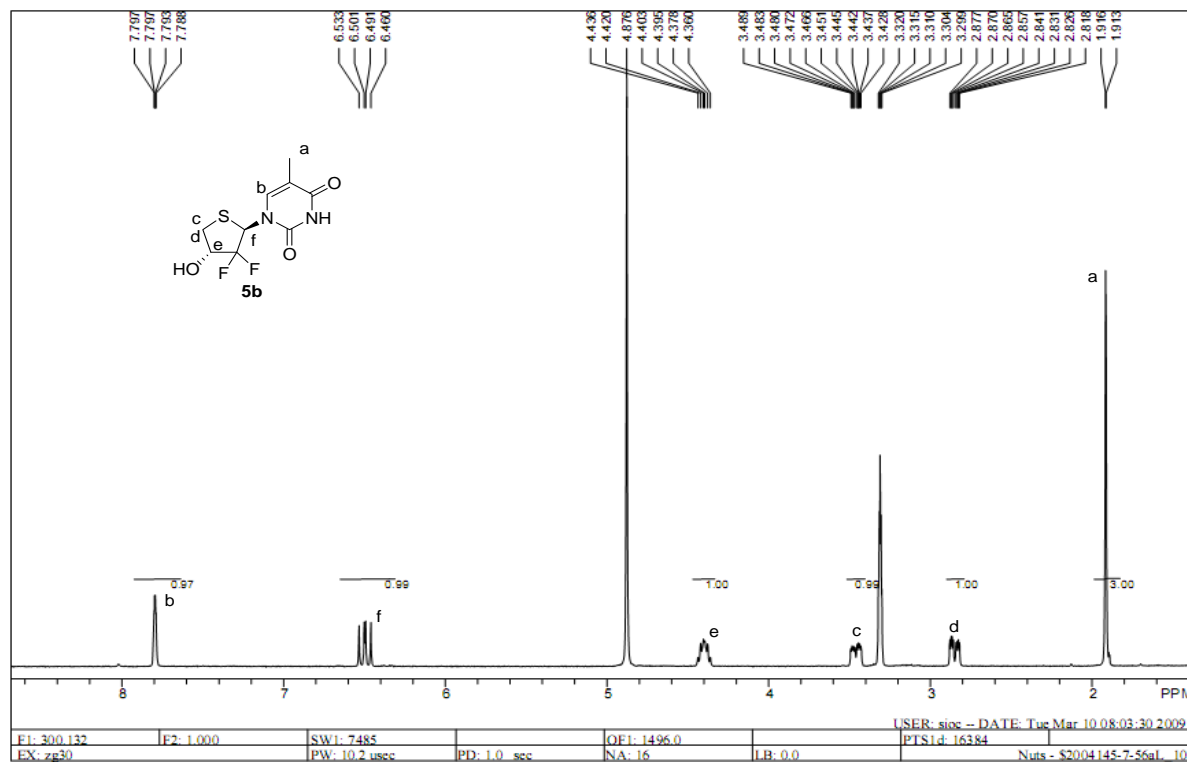

<sup>13</sup>C NMR

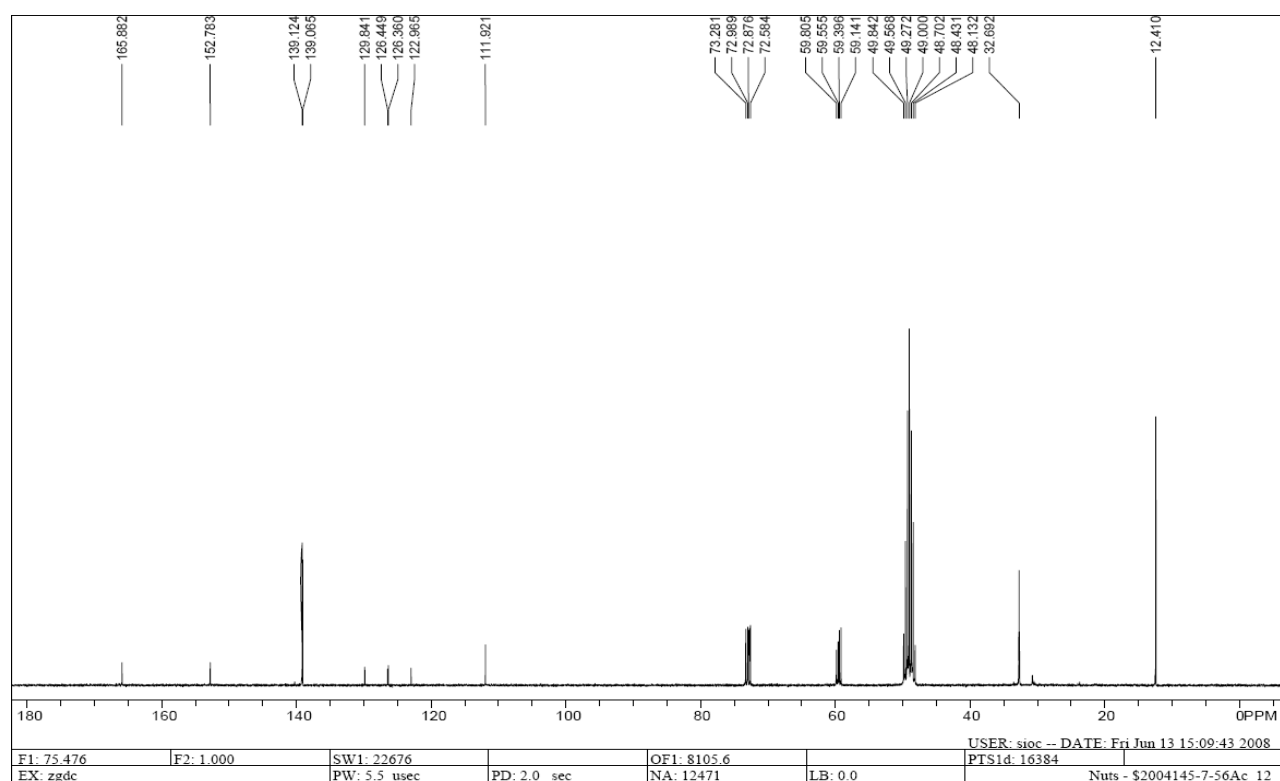

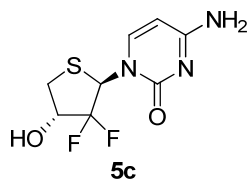

<sup>1</sup>H NMR

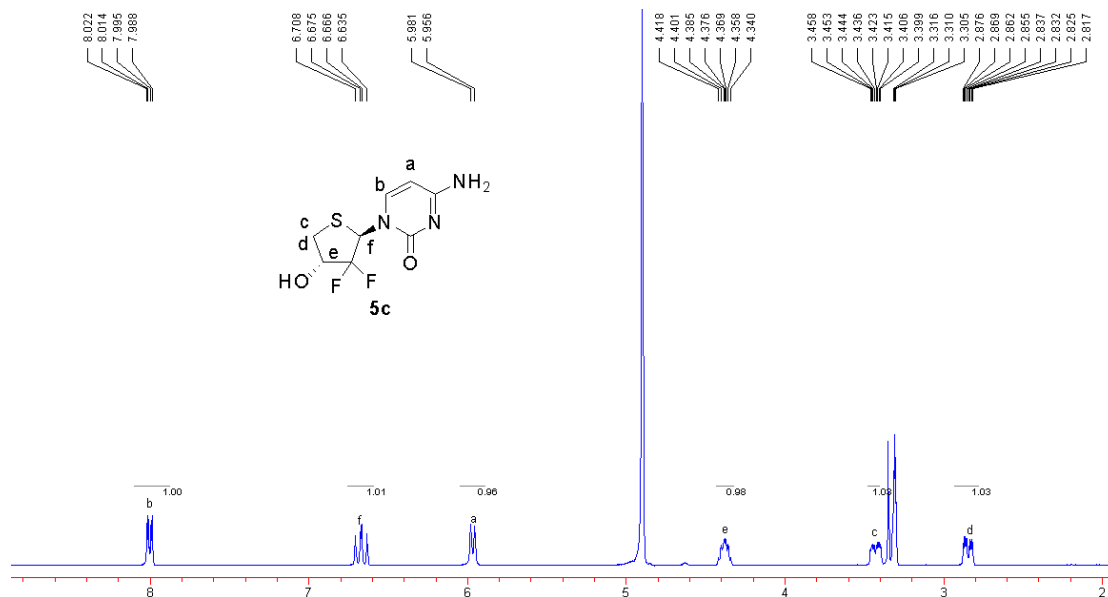

<sup>13</sup>C NMR

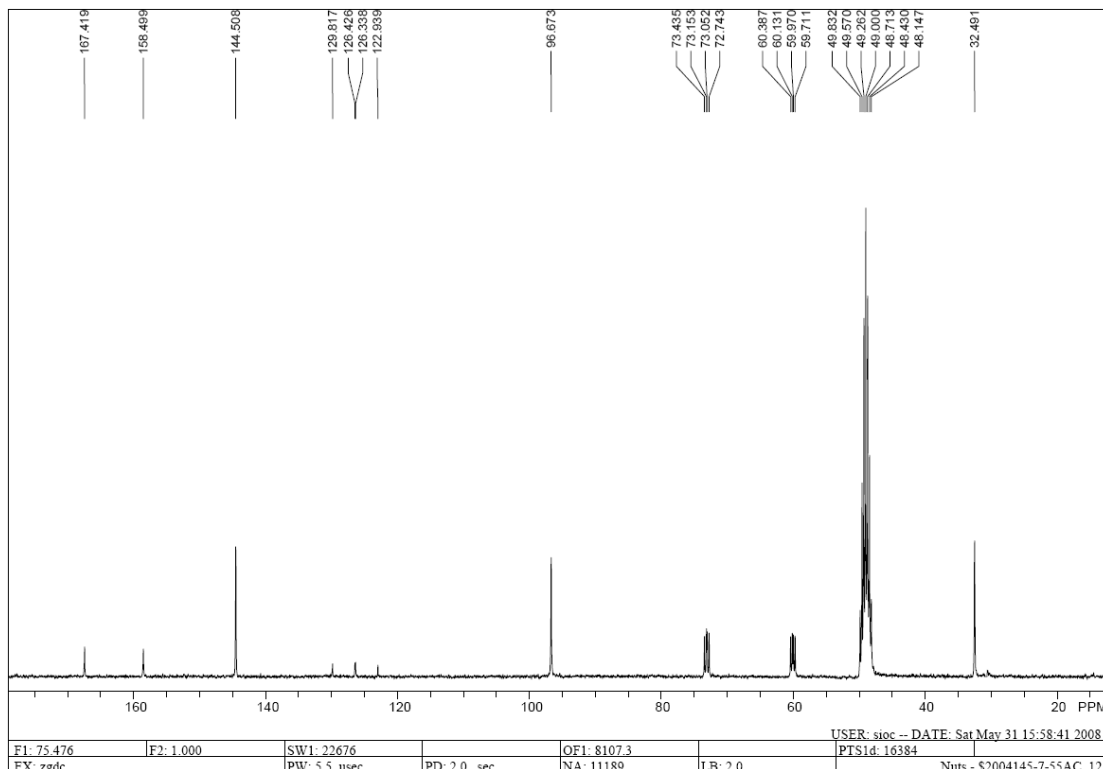

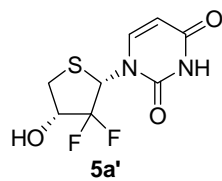

<sup>1</sup>H NMR

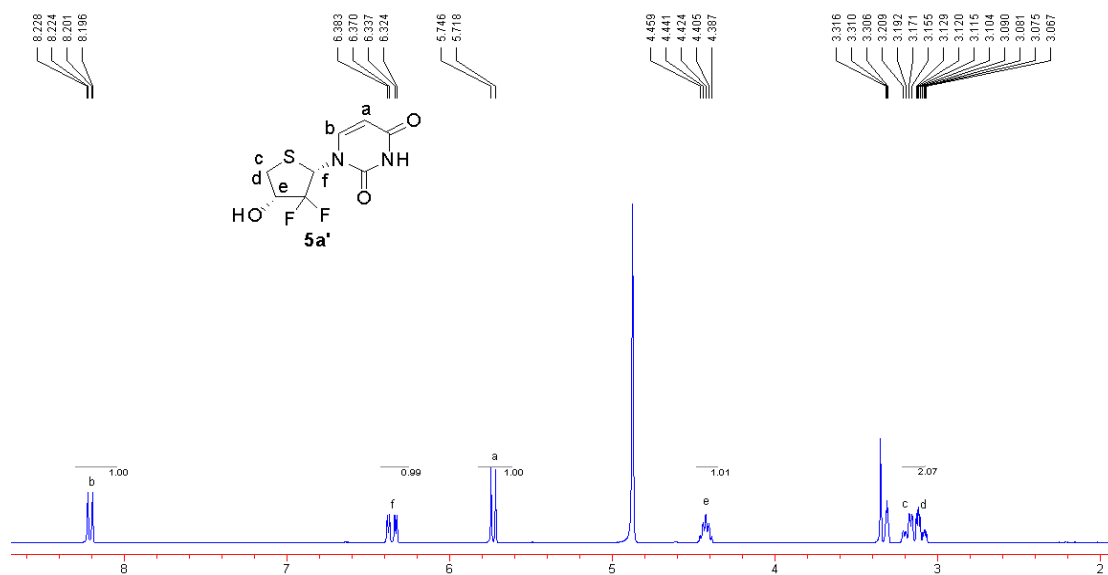

<sup>13</sup>C NMR

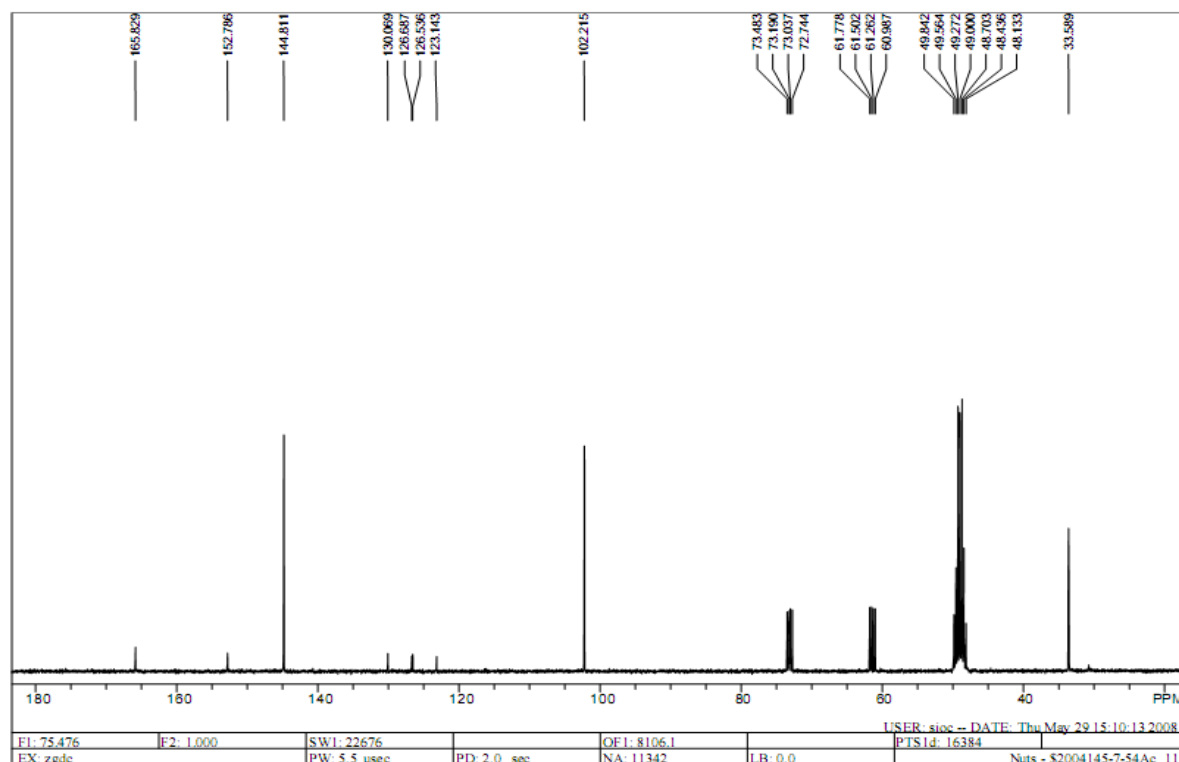

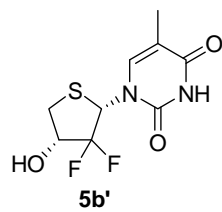

<sup>1</sup>H NMR

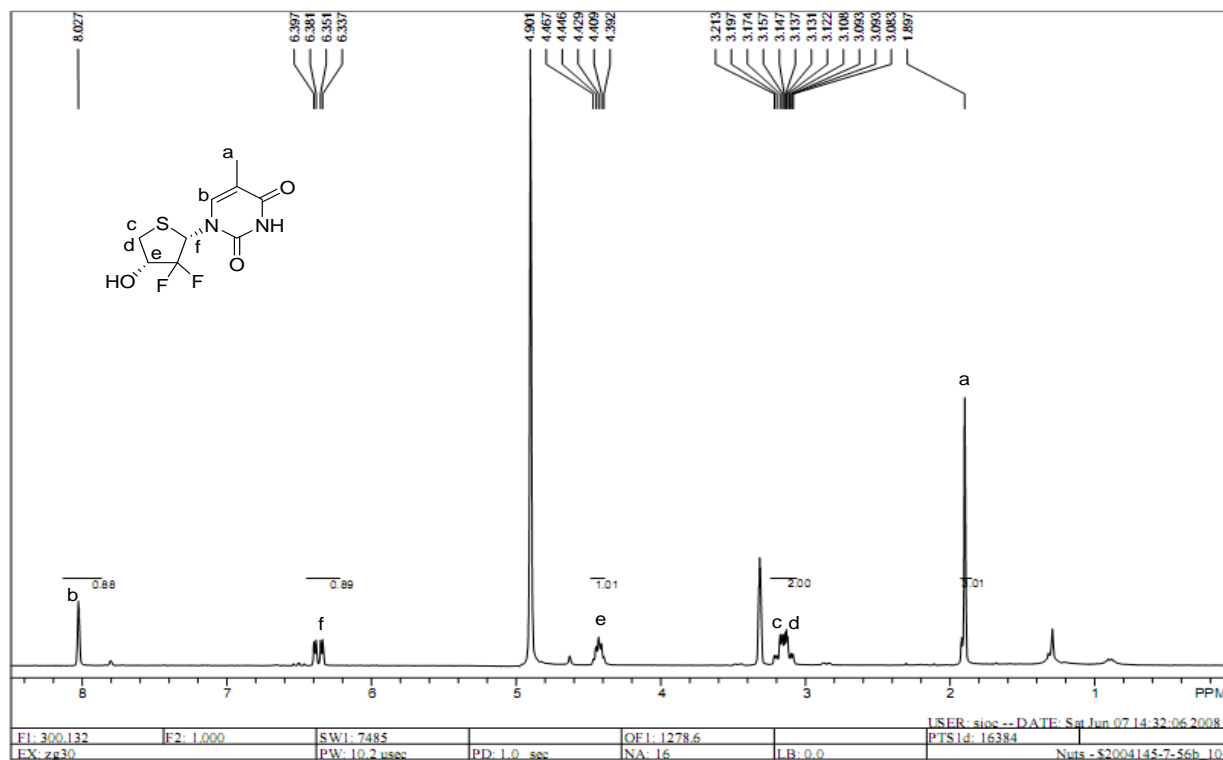

<sup>13</sup>C NMR

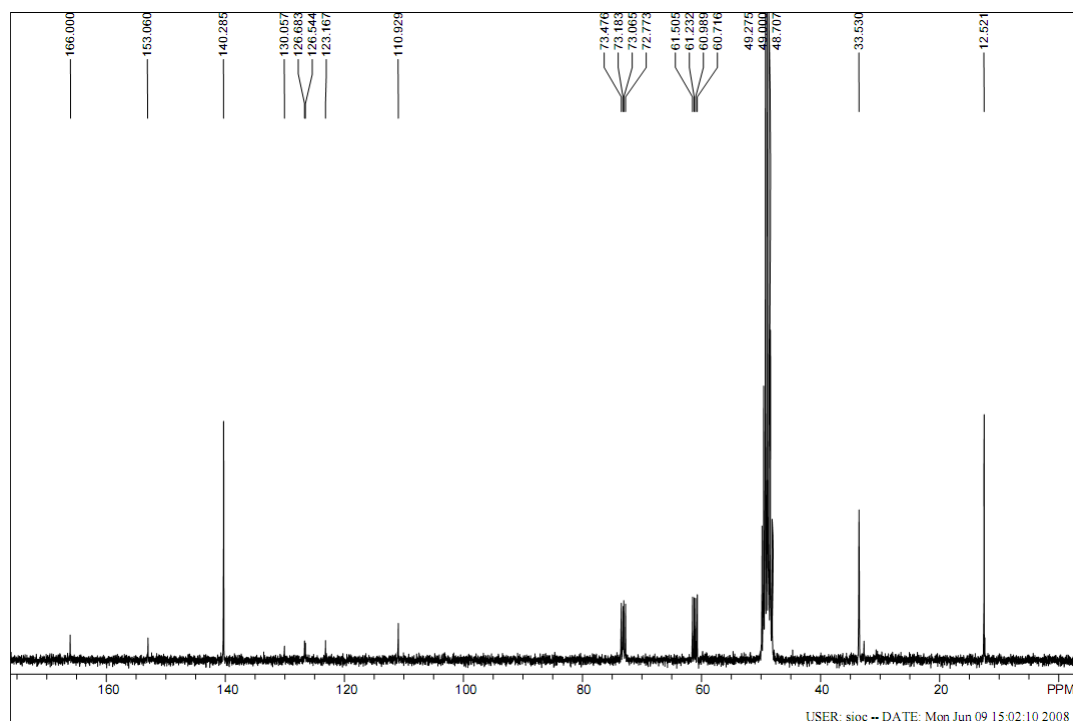

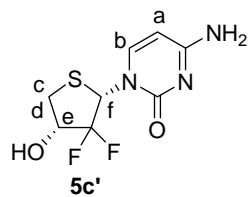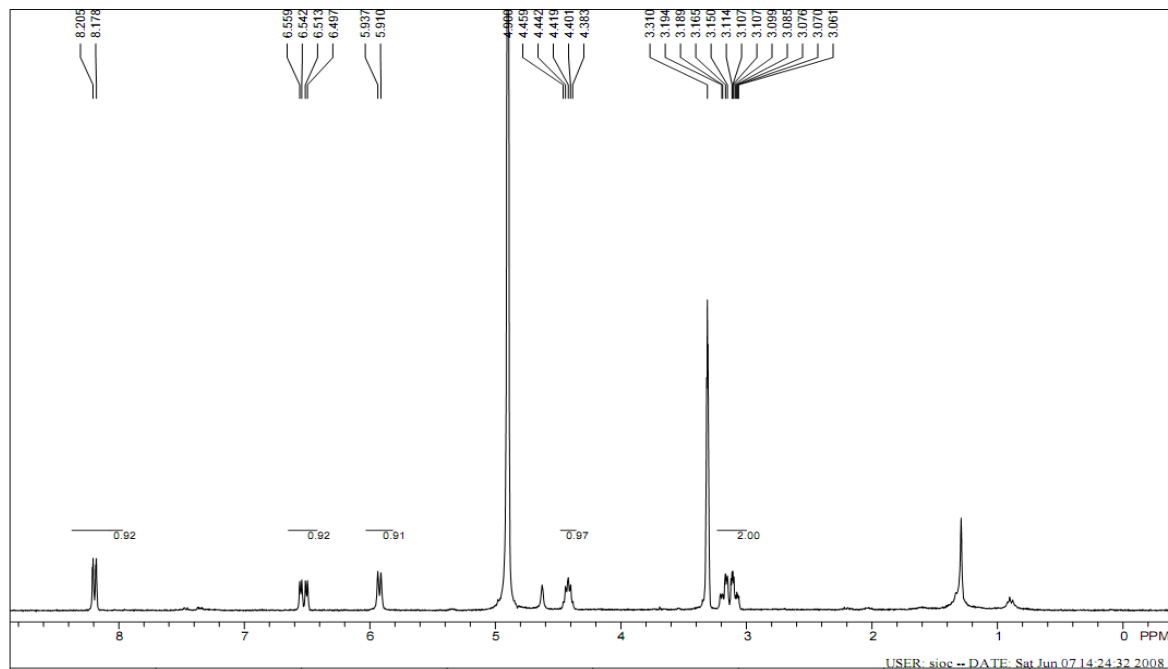

<sup>13</sup>C NMR

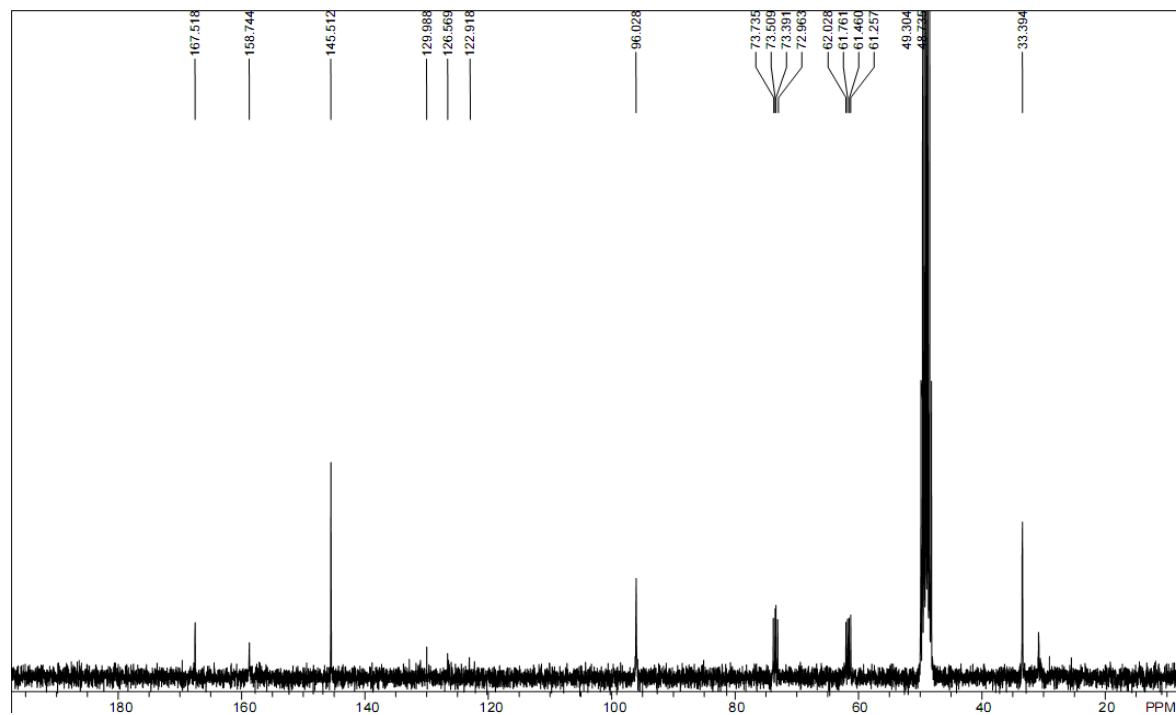

Supplement: b914679b.pdf [file b914679b.pdf]
